# Supplementary material for: Highly specific detection of KRAS single nucleotide polymorphism by asymmetric PCR/SERS assay
Source: Royal Society of Chemistry journal article supplement (doi:10.1039/d1an01108a), 2021-01-01
Supplement: d1an01108a1.pdf [file d1an01108a1.pdf]

## *Electronic Supplementary Information*

# Highly specific detection of KRAS single nucleotide polymorphism by asymmetric PCR/SERS assay

Nana Lyu<sup>a</sup>, Vinoth Kumar Rajendran<sup>a</sup>, Jun Li<sup>b</sup>, Alexander Engel<sup>c,d</sup>, Mark P. Molloy<sup>✉b</sup> and Yuling Wang<sup>✉a</sup>

a. ARC Centre of Excellence for Nanoscale BioPhotonics and Department of Molecular Sciences, Macquarie University, Sydney, NSW 2109, Australia. Email: [yuling.wang@mq.edu.au](mailto:yuling.wang@mq.edu.au)

b. Bowel Cancer and Biomarker Laboratory, Kolling Institute, The University of Sydney, NSW 2006, Australia. Email: [m.molloy@sydney.edu.au](mailto:m.molloy@sydney.edu.au)

c. Department of Colorectal Surgery, Royal North Shore Hospital, Sydney, NSW 2065, Australia.

d. Sydney Medical School, The University of Sydney, NSW 2006, Australia

**Table S1.** Sequences of oligonucleotides and PCR amplicon used in this study

| Oligonucleotides                          | 5'-Sequence-3'                                                                                                               |
|-------------------------------------------|------------------------------------------------------------------------------------------------------------------------------|
| KRAS F-Primer (10 μM)                     | /5Biosg/TGACTGAATATAAACTTGTGGTAGTTG (Tm: 66.3°C)                                                                             |
| KRAS R-Primer (2.5 μM)                    | GATCATATTCGTCCACAAAATGATTCTGA (Tm: 66.4°C)                                                                                   |
| KRAS G12V probe                           | /5ThioMC6-D/TTTTT <u>CCTACGCCA</u> ACAG                                                                                      |
| KRAS amplicon<br>(length: 99 nucleotides) | TGACTGAATATAAACTTGTGGTAGTTGGAGCTG <u>T</u> TGGCGTAGG<br>CAAGAGTGCCTTGACGATACAGCTAATCAGAATCATT <u>T</u> TGTG<br>GACGAATATGATC |

Modifications are as indicated. 5Biosg: 5'-biotin modified; 5ThioMC6-D: 5'-thiol modifier C6 S-S (disulfide). The text in blue represents position of primers; The text in red highlights complementary sequences in amplicons and probe nanotags; The underlined text refers to the single nucleotide polymorphism. The concentration-adjusted melting temperature (Tm) is calculated according to the nearest-neighbor formula,<sup>1,2</sup> with the concentrations of 10 mM and 3 mM for monovalent and divalent cations, respectively.

**Table S2.** Reaction mixture for asymmetric PCR

| Reaction mixture                   | Volume ( $\mu\text{L}$ ) |
|------------------------------------|--------------------------|
| 5x MyTaq Reaction Buffer           | 4                        |
| KRAS F-Primer (10 $\mu\text{M}$ )  | 1.2                      |
| KRAS R-Primer (2.5 $\mu\text{M}$ ) | 1.2                      |
| MyTaq HS DNA Polymerase            | 0.3                      |
| Input targets                      | 2                        |
| Nuclease-free water                | 11.3                     |
| <b>Total volume</b>                | <b>20</b>                |

**Table S3.** Reaction mixture for quantitative PCR

| Reaction mixture                        | Volume ( $\mu\text{L}$ ) |
|-----------------------------------------|--------------------------|
| iTaq Universal SYBR Green supermix (2x) | 10                       |
| KRAS F-Primer (10 $\mu\text{M}$ )       | 1.2                      |
| KRAS R-Primer (2.5 $\mu\text{M}$ )      | 1.2                      |
| Input targets                           | 2                        |
| Nuclease-free water                     | 5.6                      |
| <b>Total volume</b>                     | <b>20</b>                |

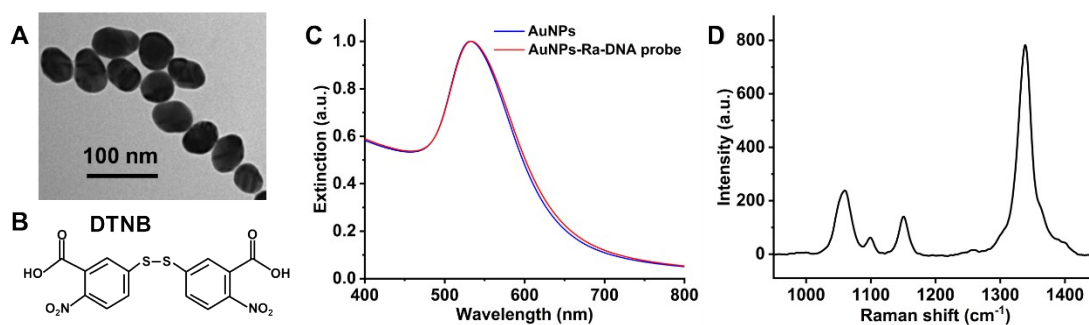

**Figure S1.** Transmission electron microscopy (TEM) image of AuNPs with size of about 60 nm (A), molecular structure of Raman reporter 5,5'-dithiobis (2-nitrobenzoic acid) (DTNB) (B), extinction spectra of bare AuNPs and SERS nanotags (C), and Raman spectra of SERS nanotags with the characteristic peak at 1339  $\text{cm}^{-1}$  (D).

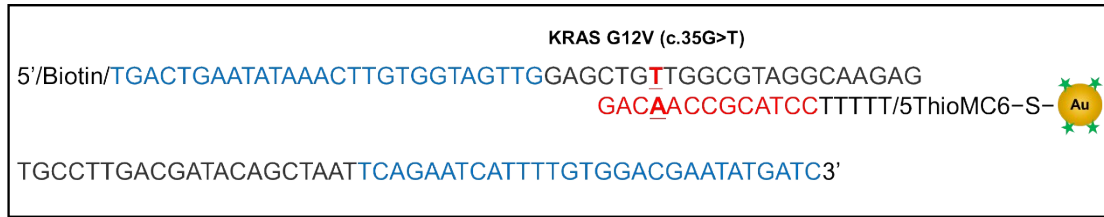

**Figure S2.** SERS nanotag functionalized with DNA probe for identifying KRAS G12V mutation.

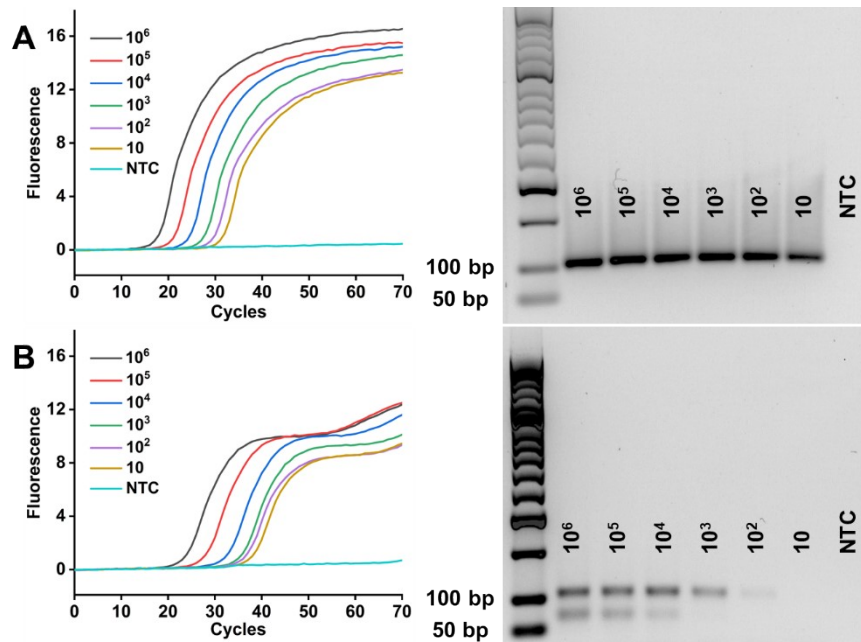

**Figure S3.** Quantitative PCR (left) and gel electrophoresis image (right, the amplification products are from 45 thermal cycles) of regular PCR with equal amounts of two primers (A) and Asy-PCR with excess forward primer to limiting reverse primer concentration ratio of 10:1 (B), respectively. The copies of input targets range from  $10^6$  to 10. NTC is the no template control.

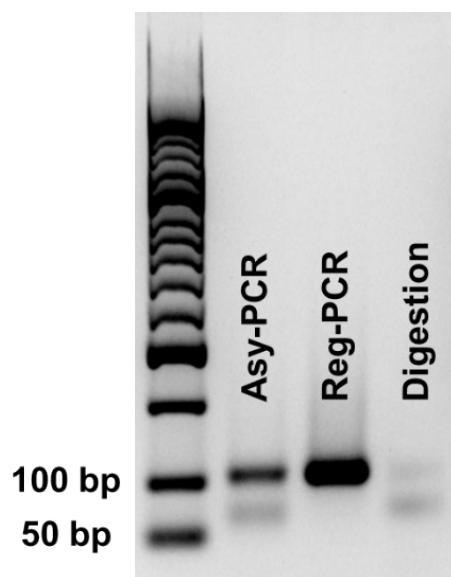

**Figure S4.** Gel electrophoresis image of the amplicons from asymmetric-PCR (Asy-PCR) and regular PCR (Reg-PCR) with  $10^4$  input synthetic targets, and the products digested from Reg-PCR with lambda exonuclease. The molecular size of ssDNA from Asy-PCR is comparable with that of ssDNA digested from dsDNA in Reg-PCR, which confirms the target amplicons from Asy-PCR.

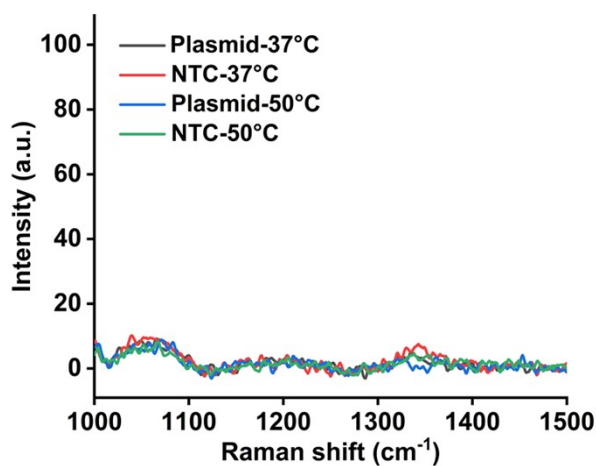

**Figure S5.** SERS spectra for the detection of Asy-PCR amplicons when the hybridization of ssDNA with allele-specific probe on SERS nanotags was undertaken at a constant temperature ( $37^\circ\text{C}$  and  $50^\circ\text{C}$ ).

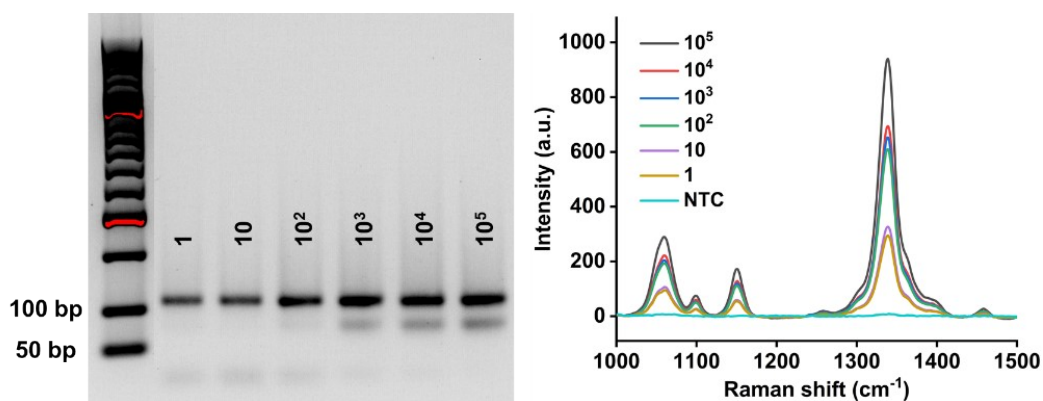

**Figure S6.** Amplification of KRAS G12V plasmid by Asy-PCR with excess to limiting primer concentration ratio of 4:1. Gel electrophoresis image (A) and typical raw Raman spectra (B) over a range of mutation loads from 1 to 10<sup>5</sup> input copies. NTC is the no template control.

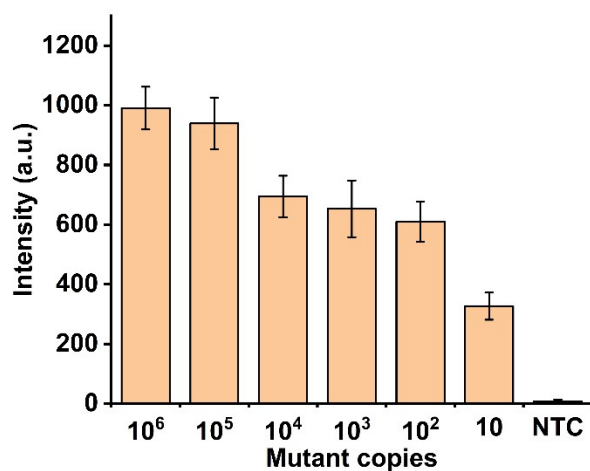

**Figure S7.** Bar graph of average SERS intensities at 1339 cm<sup>-1</sup> over a range of mutation loads from 10<sup>6</sup> to 10 input copies. Error bar represents standard deviation (SD) of 3 independent experiments.

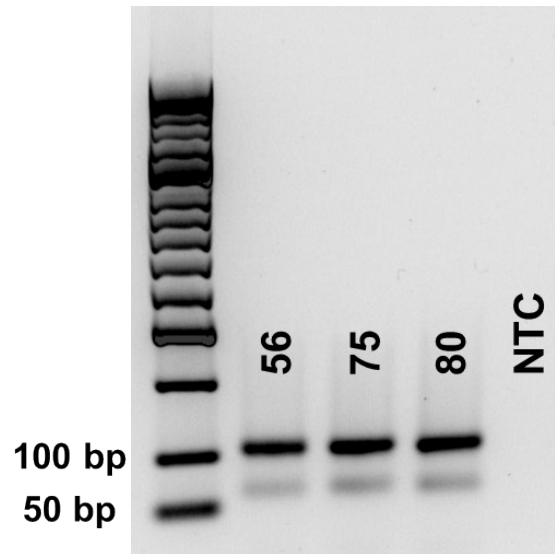

**Figure S8.** Gel electrophoresis image of Asy-PCR amplicons from patients' DNA samples. NTC is the no template control.

#### References

- 1 J. SantaLucia, 1998, **95**, 1460-1465.
- 2 N. von Ahsen, C. T. Wittwer and E. Schütz, *Clin. Chem.*, 2001, **47**, 1956-1961.
